# Supplementary material
Source: PubMed Central journal article supplement (PMC2966063)
Supplement: supp_M110.160465_Supplem.pdf [file supp_M110.160465_Supplem.pdf]

| Species (NCBI Accession number)                       | GG(L/V/I)G |   |        |   | YF |   |
|-------------------------------------------------------|------------|---|--------|---|----|---|
|                                                       | G          | G | L(V/I) | G | Y  | F |
| <i>Mycobacterium tuberculosis</i> (2BMX_C)            |            |   |        |   |    |   |
| <i>Solibacter usitatus</i> (ZP_00523582)              |            |   |        |   |    |   |
| <i>Bradyrhizobium japonicum</i> (NP_768417)           |            |   |        |   |    |   |
| <i>Zymomonas mobilis</i> (YP_163467)                  |            |   |        |   |    |   |
| <i>Candidatus Carsonella ruddii</i> (AAK15374)        |            |   |        |   |    |   |
| <i>Salmonella typhimurium</i> (1KYG_E)                |            |   |        |   |    |   |
| <i>Novosphingobium aromaticivorans</i> (ZP_00303766)  |            |   |        |   |    |   |
| <i>Bacillus subtilis</i> (NP_391889)                  |            |   |        |   |    |   |
| <i>Burkholderia vietnamiensis</i> (YP_001117079)      |            |   |        |   |    |   |
| <i>Porphyromonas gingivalis</i> (NP_904903))          |            |   |        |   |    |   |
| <i>Treponema pallidum</i> (NP_218950)                 |            |   |        |   |    |   |
| <i>Enterococcus faecalis</i> (NP_816369)              |            |   |        |   |    |   |
| <i>Pyrococcus furiosus</i> (NP_578451)                |            |   |        |   |    |   |
| <i>Clostridium pasteurianum</i> (P23161)              | .          | . | .      | . |    |   |
| <b>*<i>Gloeobacter violaceus</i> (NP_926104)</b>      |            |   |        |   |    |   |
| <i>Symbiobacterium thermophilum</i> (YP_074755)       | .          | . | .      | . |    |   |
| <i>Entamoeba histolytica</i> (XP_648522)              | .          | . | V      | . | .  | L |
| <i>Theileria annulata</i> (XP_954538))                | .          | . | V      | S | .  | L |
| <i>Odontella sinensis</i> (NP_043640)                 | .          | . | .      | E | .  | . |
| <i>Porphyra purpurea</i> (NP_053882)                  | .          | . | .      | . | .  | . |
| <b>*<i>Anabaena</i> sp. PCC 7120 (NP_488681)</b>      | .          | . | V      | . | .  | . |
| <b>*<i>Synechocystis</i> sp. PCC 6803 (NP_442066)</b> | .          | . | I      | . | .  | . |
| <i>Chlamydomonas reinhardtii</i> (XP_001696611)       | .          | . | .      | . | .  | . |
| <i>Arabidopsis thaliana</i> (NP_187769)               | .          | . | .      | . | .  | . |
| <i>Oryza sativa Japonica</i> (NP_001047050)           | .          | . | .      | . | .  | . |
| <i>Helicobacter pylori</i> (NP_208354)                | .          | . | I      | . | .  | L |
| <i>Photobacterium profundum</i> SS9 (YP_130756)       | .          | . | I      | . | .  | L |
| <i>Buchnera aphidicola</i> (NP_240013)                | .          | . | I      | . | .  | L |
| <i>Ehrlichia canis</i> (ZP_00210629)                  | .          | . | I      | D | .  | L |
| <i>Rickettsia sibirica</i> (ZP_00142102))             | .          | . | .      | . | .  | L |
| <i>Rhodospirillum rubrum</i> (ZP_00270495)            | .          | . | .      | . | .  | L |
| <i>Plasmodium falciparum</i> (NP_702257)              | .          | . | I      | . | .  | L |
| <i>Chlamydomonas pneumoniae</i> (NP_300835)           | .          | . | I      | E | .  | . |
| <i>Chlorobium tepidum</i> (NP_662377)                 | .          | . | I      | Q | .  | . |
| <i>Cryptosporidium parvum</i> (XP_665587)             | .          | . | I      | . | .  | L |
| <i>Rhodopirellula baltica</i> (NP_868257)             | .          | . | I      | . | F  | . |
| <i>Trichomonas vaginalis</i> (XP_001313356)           | .          | . | .      | . | .  | . |
| <i>Dictyostelium discoideum</i> (XP_644052)           | .          | . | .      | . | .  | . |
| <i>Leptospira interrogans</i> (YP_001188)             | .          | . | I      | . | .  | . |
| <i>Homo sapiens</i> (1QMV_A)                          | .          | . | .      | . | .  | . |
| <i>Danio rerio</i> (NP_001013489)                     | .          | . | .      | . | F  | . |
| <i>Drosophila melanogaster</i> (NP_477510)            | .          | . | .      | . | .  | . |
| <i>Biomphalaria glabrata</i> (AAK26236)               | .          | . | .      | . | .  | . |
| <i>Trypanosoma cruzi</i> (1UUL_J)                     | .          | . | .      | . | .  | . |
| <i>Caenorhabditis elegans</i> (NP_497892)             | .          | . | .      | . | .  | . |
| <i>Saccharomyces cerevisiae</i> (NP_013684)           | .          | . | .      | . | .  | . |
| <i>Schizosaccharomyces pombe</i> (NP_588430)          | .          | . | .      | . | .  | . |
| <i>Trypanosoma brucei</i> (XP_847032)                 | .          | . | .      | . | .  | . |
| <i>Cryptococcus neoformans</i> (XP_571871)            | .          | . | .      | . | .  | . |

**Suppl. Table 1.** Analysis of the GG(L/V/I)G and YF motifs in 2-Cys Prx from different organisms. Blue, prokaryotes; Red, Eukaryotes. Dot indicates absolute conservation of residue. Cyanobacteria (in bold) are marked with asterisks.

| Strain                                      | NTRC | Srx | 2-Cys Prx | Catalase |
|---------------------------------------------|------|-----|-----------|----------|
| <i>Anabaena</i> sp. PCC 7120                | •    | •   | •         |          |
| <i>Anabaena variabilis</i> ATCC 29413       | •    | •   | •         |          |
| <i>Nostoc punctiforme</i> ATCC29133         | •    | •   | •         |          |
| <i>Microcystis aeruginosa</i> NIES-843      | •    | •   | •         |          |
| <i>Synechococcus elongatus</i> PCC 7942     | •    | •   | •         | •        |
| <i>Synechococcus elongatus</i> PCC 6301     | •    | •   | •         |          |
| <i>Acaryochloris marina</i> MBIC11017       | •    | •   | •         | •        |
| <i>Synechococcus</i> sp. JA-3-3Ab           | •    | •   | •         |          |
| <i>Synechococcus</i> sp. JA-2-3B'a(2-13)    | •    | •   | •         |          |
| <i>Thermosynechococcus elongatus</i> BP-1   | •    | •   | •         |          |
| <i>Synechococcus</i> sp.CC9311              | •    | •   | •         |          |
| <i>Synechococcus</i> sp.WH7803              | •    | •   | •         | •        |
| <i>Synechococcus</i> sp.WH8102              | •    |     | •         |          |
| <i>Synechococcus</i> sp.CC9902              | •    |     | •         |          |
| <i>Synechococcus</i> sp.CC9605              | •    |     | •         | •        |
| <i>Synechococcus</i> sp.RCC307              | •    |     | •         | •        |
| <i>Prochlorococcus marinus</i> SS120        | •    |     | •         |          |
| <i>Prochlorococcus marinus</i> str. NATL2A  | •    |     | •         |          |
| <i>Prochlorococcus marinus</i> str. NATL1A  | •    |     | •         |          |
| <i>Prochlorococcus marinus</i> str. MIT9211 | •    |     | •         |          |
| <i>Prochlorococcus marinus</i> str. MIT9515 | •    |     | •         |          |
| <i>Prochlorococcus marinus</i> str. MIT9301 | •    |     | •         |          |
| <i>Prochlorococcus marinus</i> MED4         | •    |     | •         |          |
| <i>Prochlorococcus marinus</i> str. AS9601  | •    |     | •         |          |
| <i>Prochlorococcus marinus</i> str. MIT9215 | •    |     | •         |          |
| <i>Prochlorococcus marinus</i> str. MIT9312 |      |     | •         |          |
| <i>Prochlorococcus marinus</i> str. MIT9313 |      |     | •         |          |
| <i>Prochlorococcus marinus</i> str. MIT9303 |      |     | •         |          |
| <i>Synechocystis</i> sp. PCC 6803           |      |     | •         | •        |
| <i>Gloeobacter violaceus</i> PCC 7421       |      |     | •         | •        |
| <i>Synechococcus</i> sp. PCC 7002           |      |     | •         | •        |
| <i>Cyanothece</i> sp. ATCC 29133            |      |     | •         |          |

**Suppl. Table 2.** Distribution of genes encoding NTRC, Srx, 2-Cys Prx and catalase in cyanobacteria. Open reading frames (ORFs) are according to the Cyanobase (<http://genome.kazusa.or.jp/cyanobase>).

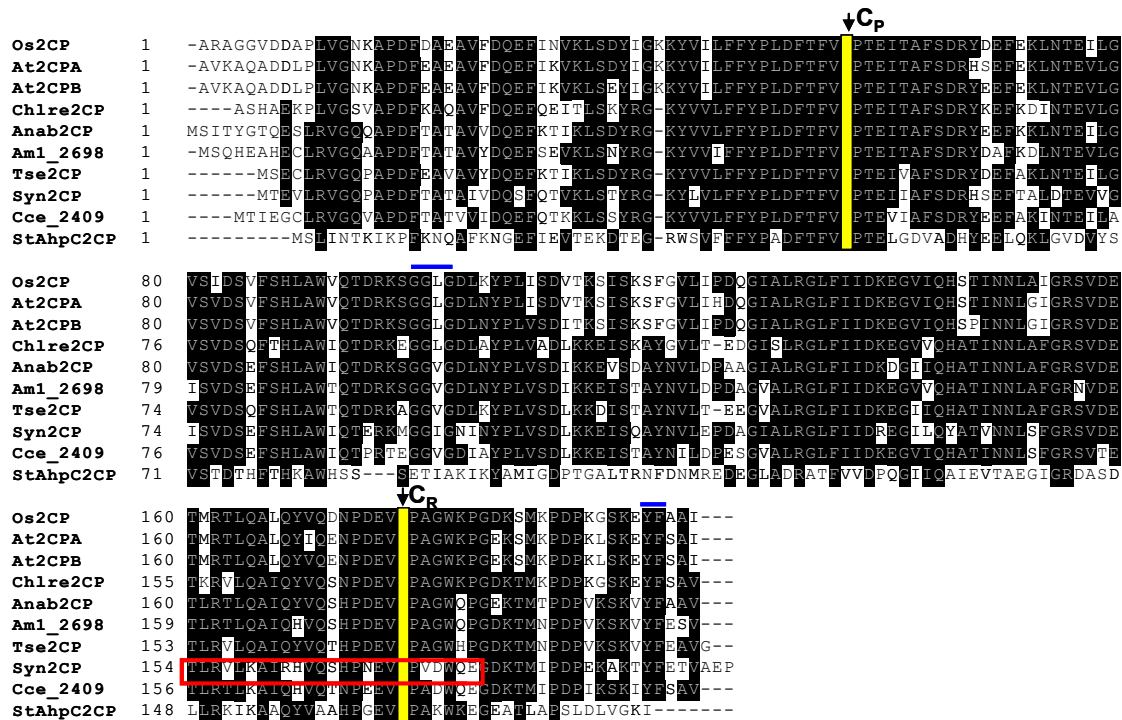

**Suppl. Fig. 1.** Sequence comparison of 2-Cys Prx from cyanobacteria and plants. The peroxidatic (C<sub>p</sub>) and resolving (C<sub>R</sub>) cysteines are marked with arrows and high-lighted in yellow. The GG(L/V/I)G and YF motifs are marked with a blue line and the region with low conservation in *Synechocystis* sp. PCC 6803 is marked in red. Plant and algal sequences show mature proteins without chloroplast transit peptides. The species represented are *Oryza sativa* (Os), *Arabidopsis thaliana* (At), *Chlamydomonas reinhardtii* (Chlre), *Anabaena* sp. PCC 7120 (Anab), *Acaryochloris marina* MBIC11017 (Am1), *Thermosynechococcus elongatus* BP-1 (Tse), *Synechocystis* sp. PCC 6803 (Syn) and *Cyanotheca* sp. ATCC 29133 (Cce). The 2-Cys Prx sequence from the non-photosynthetic bacterium *Staphylococcus aureus* (StAhpC2CP) was also included.

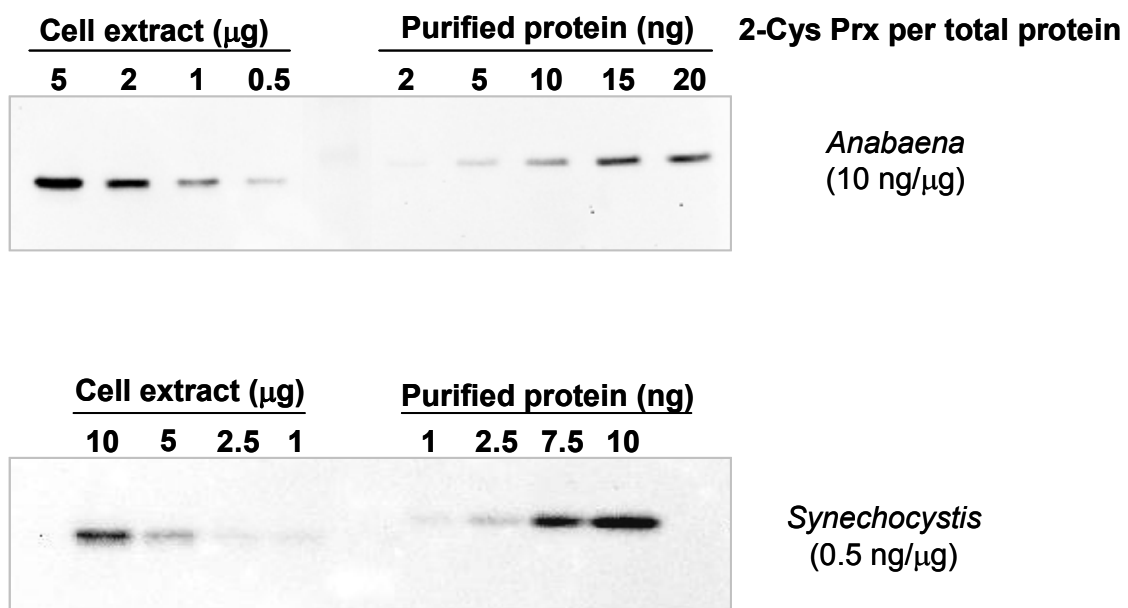

**Suppl. Fig. 2.** Quantitative Western blot analysis of the content of 2-Cys Prx in cyanobacteria. Increasing amounts of protein extracts, as indicated, from *Anabaena* or *Synechocystis* cultures, and purified proteins were subjected to SDS-PAGE and Western blot using an anti-2-Cys Prx antibody raised against the rice enzyme (for *Anabaena*) or against the *Synechocystis* enzyme (for *Synechocystis*).
